# Supplementary material for: Genome-Wide Analysis of Nascent Transcription in Saccharomyces cerevisiae
Source: PubMed Central journal article supplement (PMC3276176; doi:10.1534/g3.111.000810), 2011-12-01
Supplement: supp_1.7.549_FigureS2.pdf [file supp_1.7.549_FigureS2.pdf]

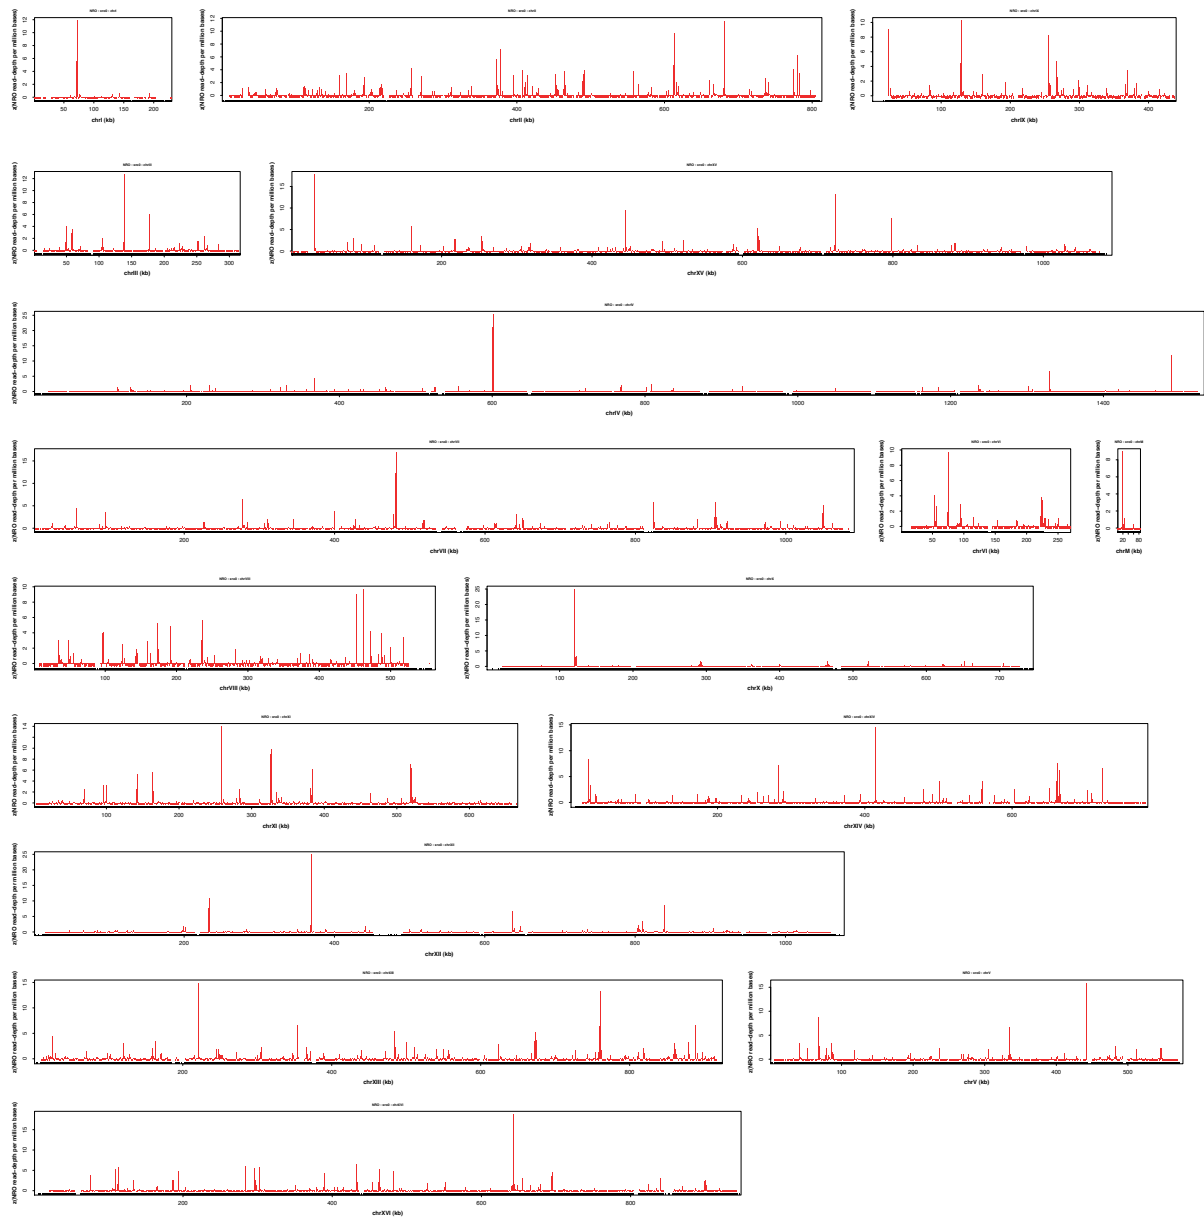

**Figure S2. Genome-wide view of nascent transcription in yeast.** Z-score of NRO read densities in 1 kb bins are shown for each chromosome. Genome-wide analysis of nascent synthesis revealed extensive transcription across the entire yeast genome. No > 3 kb clusters are observed to have read densities >3.1 z-scores.
