# Supplementary material for: Genome-Wide Analysis of Nascent Transcription in Saccharomyces cerevisiae
Source: PubMed Central journal article supplement (PMC3276176; doi:10.1534/g3.111.000810), 2011-12-01
Supplement: supp_1.7.549_FigureS3.pdf [file supp_1.7.549_FigureS3.pdf]

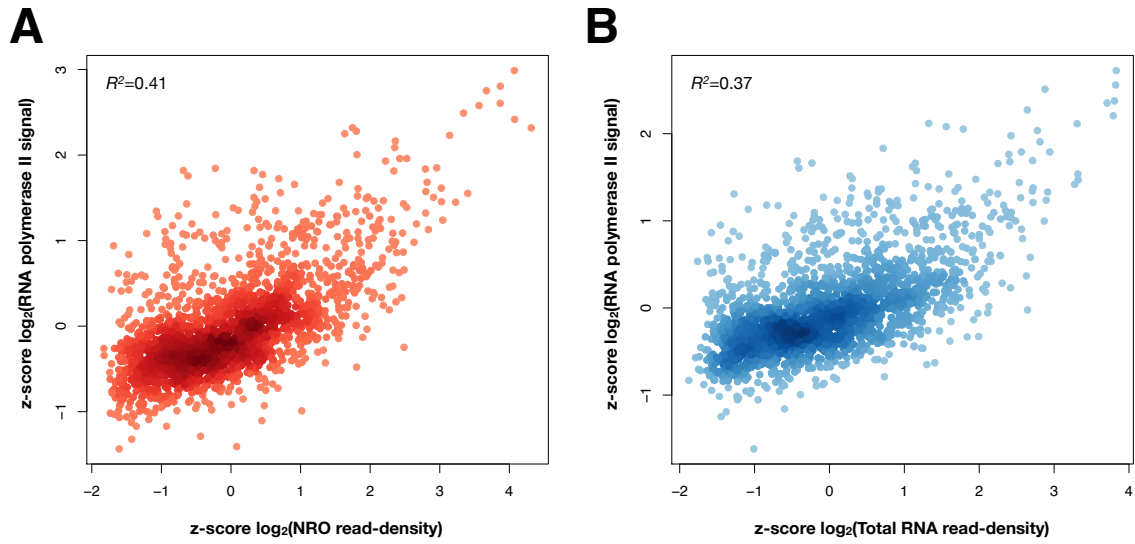

**Figure S3. RNA polymerase II density is better correlated with nascent transcription than with transcript abundance.** Correlation between NRO (A) and total RNA (B) read densities to RNA polymerase II density from Lefrancois et al. 2009 study [3] within non-overlapping transcript models (Pearson's  $R^2 = 0.41$  and  $R^2 = 0.37$ , respectively).
