# Supplementary material for: Genome-Wide Analysis of Nascent Transcription in Saccharomyces cerevisiae
Source: PubMed Central journal article supplement (PMC3276176; doi:10.1534/g3.111.000810), 2011-12-01
Supplement: supp_1.7.549_TableS4.pdf [file supp_1.7.549_TableS4.pdf]

**Table S4. GO term enrichment analysis for transcripts at top of the ranking by ratios of nascent transcription to transcript abundance (GORilla).**

|                | GO Term         | Description                                       | P-value                    | Enrichment | N    | B    | n   | b   |
|----------------|-----------------|---------------------------------------------------|----------------------------|------------|------|------|-----|-----|
| <b>Process</b> | GO:0015893      | drug transport                                    | 5.11E-06                   | 8.58       | 2383 | 13   | 171 | 8   |
|                | GO:0006414      | translational elongation                          | 7.02E-06                   | 4.85       | 2383 | 172  | 40  | 14  |
|                | GO:0010033      | response to organic substance                     | 1.06E-05                   | 1.83       | 2383 | 50   | 991 | 38  |
|                | GO:0006855      | drug transmembrane transport                      | 1.25E-05                   | 17.94      | 2383 | 8    | 83  | 5   |
|                | GO:0000296      | spermine transport                                | 5.19E-05                   | 238.3      | 2383 | 4    | 5   | 2   |
|                | GO:0015849      | organic acid transport                            | 7.35E-05                   | 2.55       | 2383 | 44   | 468 | 22  |
|                | GO:0007165      | signal transduction                               | 1.00E-04                   | 1.76       | 2383 | 117  | 578 | 50  |
|                | GO:0030447      | filamentous growth                                | 1.51E-04                   | 1.77       | 2383 | 50   | 940 | 35  |
|                | GO:0006468      | protein amino acid phosphorylation                | 1.55E-04                   | 1.69       | 2383 | 64   | 923 | 42  |
|                | GO:0006075      | 1,3-beta-glucan biosynthetic process              | 1.64E-04                   | 76.87      | 2383 | 2    | 31  | 2   |
|                | GO:0006074      | 1,3-beta-glucan metabolic process                 | 1.64E-04                   | 76.87      | 2383 | 2    | 31  | 2   |
|                | GO:0051274      | beta-glucan biosynthetic process                  | 1.70E-04                   | 38.44      | 2383 | 6    | 31  | 3   |
|                | GO:0016310      | phosphorylation                                   | 1.71E-04                   | 1.65       | 2383 | 72   | 923 | 46  |
|                | GO:0051273      | beta-glucan metabolic process                     | 3.35E-04                   | 32.94      | 2383 | 7    | 31  | 3   |
|                | GO:0019932      | second-messenger-mediated signaling               | 3.58E-04                   | 4.35       | 2383 | 15   | 329 | 9   |
|                | GO:0016049      | cell growth                                       | 4.10E-04                   | 1.85       | 2383 | 37   | 940 | 27  |
|                | GO:0015837      | amine transport                                   | 4.31E-04                   | 2.72       | 2383 | 30   | 468 | 16  |
|                | GO:0055085      | transmembrane transport                           | 4.56E-04                   | 1.55       | 2383 | 182  | 575 | 68  |
|                | GO:0019236      | response to pheromone                             | 5.31E-04                   | 2.16       | 2383 | 21   | 892 | 17  |
|                | GO:0065009      | regulation of molecular function                  | 6.13E-04                   | 2.51       | 2383 | 77   | 259 | 21  |
|                | GO:0023052      | signaling                                         | 6.69E-04                   | 1.44       | 2383 | 137  | 909 | 75  |
|                | GO:0023033      | signaling pathway                                 | 6.69E-04                   | 1.44       | 2383 | 137  | 909 | 75  |
|                | GO:0015846      | polyamine transport                               | 7.73E-04                   | 105.91     | 2383 | 9    | 5   | 2   |
|                | GO:0070783      | growth of unicellular organism as a thread of     | 8.37E-04                   | 1.8        | 2383 | 38   | 940 | 27  |
|                | GO:0044182      | filamentous growth of a population of unicellular | 8.37E-04                   | 1.8        | 2383 | 38   | 940 | 27  |
|                | GO:0030811      | regulation of nucleotide catabolic process        | 9.57E-04                   | 5.88       | 2383 | 21   | 135 | 7   |
|                | GO:0033121      | regulation of purine nucleotide catabolic process | 9.57E-04                   | 5.88       | 2383 | 21   | 135 | 7   |
|                | GO:0007187      | G-protein signaling, coupled to cyclic nucleotide | 9.63E-04                   | 7.24       | 2383 | 4    | 329 | 4   |
|                | GO:0007188      | G-protein signaling, coupled to cAMP nucleotide   | 9.63E-04                   | 7.24       | 2383 | 4    | 329 | 4   |
|                | <b>Function</b> | GO:0004871                                        | signal transducer activity | 2.85E-07   | 2.76 | 2383 | 35  | 617 |
| GO:0060089     |                 | molecular transducer activity                     | 2.85E-07                   | 2.76       | 2383 | 35   | 617 | 25  |
| GO:0005215     |                 | transporter activity                              | 8.30E-06                   | 1.65       | 2383 | 180  | 611 | 76  |
| GO:0004672     |                 | protein kinase activity                           | 2.44E-05                   | 1.78       | 2383 | 61   | 923 | 42  |
| GO:0003700     |                 | sequence-specific DNA binding transcription       | 2.82E-05                   | 1.71       | 2383 | 64   | 979 | 45  |
| GO:0015297     |                 | antiporter activity                               | 2.85E-05                   | 74.47      | 2383 | 8    | 12  | 3   |
| GO:0000297     |                 | spermine transmembrane transporter activity       | 5.19E-05                   | 238.3      | 2383 | 4    | 5   | 2   |
| GO:0022892     |                 | substrate-specific transporter activity           | 6.73E-05                   | 1.65       | 2383 | 160  | 588 | 65  |
| GO:0004674     |                 | protein serine/threonine kinase activity          | 6.77E-05                   | 1.77       | 2383 | 57   | 923 | 39  |
| GO:0022857     |                 | transmembrane transporter activity                | 7.08E-05                   | 2.37       | 2383 | 153  | 197 | 30  |
| GO:0005099     |                 | Ras GTPase activator activity                     | 1.80E-04                   | 7.27       | 2383 | 17   | 135 | 7   |
| GO:0015238     |                 | drug transmembrane transporter activity           | 2.49E-04                   | 11.96      | 2383 | 12   | 83  | 5   |
| GO:0005096     |                 | GTPase activator activity                         | 2.85E-04                   | 5.3        | 2383 | 30   | 135 | 9   |
| GO:0015203     |                 | polyamine transmembrane transporter activity      | 3.83E-04                   | 136.17     | 2383 | 7    | 5   | 2   |
| GO:0016773     |                 | phosphotransferase activity, alcohol group as     | 4.51E-04                   | 1.55       | 2383 | 88   | 923 | 53  |
| GO:0005088     |                 | Ras guanyl-nucleotide exchange factor activity    | 4.56E-04                   | 4.56       | 2383 | 6    | 523 | 6   |
| GO:0043565     |                 | sequence-specific DNA binding                     | 4.63E-04                   | 1.6        | 2383 | 120  | 697 | 56  |
| GO:0015291     |                 | secondary active transmembrane transporter        | 5.99E-04                   | 35.04      | 2383 | 17   | 12  | 3   |
| GO:0005097     |                 | Rab GTPase activator activity                     | 7.62E-04                   | 8.83       | 2383 | 10   | 135 | 5   |
| GO:0005275     |                 | amine transmembrane transporter activity          | 8.54E-04                   | 2.53       | 2383 | 24   | 588 | 15  |
| <b>Comp.</b>   | GO:0005886      | plasma membrane                                   | 9.90E-07                   | 3.95       | 2383 | 175  | 69  | 20  |
|                | GO:0031224      | intrinsic to membrane                             | 3.57E-04                   | 2.09       | 2383 | 460  | 72  | 29  |

*N*: Total number of genes. *B*: Total number of genes with specific GO term (background). *n*: Total number of genes in "target" set. *b*: Total number of genes with specific GO term in "target" set.
