# Supplementary material for: Genome-Wide Analysis of Nascent Transcription in Saccharomyces cerevisiae
Source: PubMed Central journal article supplement (PMC3276176; doi:10.1534/g3.111.000810), 2011-12-01
Supplement: supp_1.7.549_TableS5.pdf [file supp_1.7.549_TableS5.pdf]

**Table S5. GO term enrichment analysis for transcripts at bottom of the ranking by ratios of nascent transcription to transcript abundance (GOrilla).**

|                  | GO Term    | Description                                      | P-value  | Enrichment | N    | B    | n   | b   |
|------------------|------------|--------------------------------------------------|----------|------------|------|------|-----|-----|
| <b>Process</b>   | GO:0006412 | translation                                      | 4.45E-09 | 1.59       | 2383 | 177  | 922 | 109 |
|                  | GO:0033044 | regulation of chromosome organization            | 3.51E-04 | 38.23      | 2383 | 11   | 17  | 3   |
|                  | GO:0006334 | nucleosome assembly                              | 3.59E-04 | 5.02       | 2383 | 14   | 271 | 8   |
|                  | GO:0030004 | cellular monovalent inorganic cation homeostasis | 7.81E-04 | 4.79       | 2383 | 17   | 234 | 8   |
| <b>Func.</b>     | GO:0003735 | structural constituent of ribosome               | 6.38E-08 | 2.41       | 2383 | 119  | 366 | 44  |
|                  | GO:0005198 | structural molecule activity                     | 9.75E-06 | 1.89       | 2383 | 189  | 366 | 55  |
| <b>Component</b> | GO:0044444 | cytoplasmic part                                 | 3.51E-07 | 1.14       | 2383 | 1190 | 984 | 559 |
|                  | GO:0044445 | cytosolic part                                   | 4.82E-07 | 1.61       | 2383 | 136  | 905 | 83  |
|                  | GO:0033279 | ribosomal subunit                                | 7.64E-07 | 1.85       | 2383 | 126  | 623 | 61  |
|                  | GO:0032991 | macromolecular complex                           | 1.53E-06 | 1.45       | 2383 | 910  | 219 | 121 |
|                  | GO:0043228 | non-membrane-bounded organelle                   | 8.46E-06 | 1.29       | 2383 | 417  | 897 | 202 |
|                  | GO:0043232 | intracellular non-membrane-bounded organelle     | 8.46E-06 | 1.29       | 2383 | 417  | 897 | 202 |
|                  | GO:0044422 | organelle part                                   | 3.19E-05 | 1.16       | 2383 | 1177 | 641 | 368 |
|                  | GO:0044446 | intracellular organelle part                     | 3.19E-05 | 1.16       | 2383 | 1177 | 641 | 368 |
|                  | GO:0015935 | small ribosomal subunit                          | 3.79E-05 | 3.14       | 2383 | 54   | 267 | 19  |
|                  | GO:0022627 | cytosolic small ribosomal subunit                | 4.48E-05 | 3.48       | 2383 | 41   | 267 | 16  |
|                  | GO:0044424 | intracellular part                               | 6.52E-05 | 1.05       | 2383 | 2149 | 688 | 649 |
|                  | GO:0005840 | ribosome                                         | 7.19E-05 | 1.45       | 2383 | 175  | 875 | 93  |
|                  | GO:0030529 | ribonucleoprotein complex                        | 9.06E-05 | 1.31       | 2383 | 309  | 898 | 152 |
|                  | GO:0022625 | cytosolic large ribosomal subunit                | 3.13E-04 | 1.74       | 2383 | 55   | 895 | 36  |
|                  | GO:0005737 | cytoplasm                                        | 8.73E-04 | 1.12       | 2383 | 1034 | 884 | 430 |

*N*: Total number of genes. *B*: Total number of genes with specific GO term (background). *n*: Total number of genes in "target" set. *b*: Total number of genes with specific GO term in "target" set.
